1  
2  
3  
4  
5  
6  
7  
8  
9  
10  
11  
12  
13  
14  
15  
16  
17  
18  
19  
20  
21  
22  
23

**Direct intracellular visualization of Ebola virus-receptor interaction by  
*in situ* proximity ligation**

Eva Mittler <sup>a</sup>, Tanwee P Alkutkar <sup>a,\*</sup>, Rohit K Jangra <sup>a</sup>, and Kartik Chandran <sup>a,#</sup>

<sup>a</sup> Albert Einstein College of Medicine, Department of Microbiology & Immunology,  
Bronx, New York, USA

Running head: Delineating EBOV GP-NPC1 binding by proximity ligation

# Address correspondence to Kartik Chandran, [kartik.chandran@einsteinmed.org](mailto:kartik.chandran@einsteinmed.org)

\* Present address: Department of Integrative Structural and Computational Biology,  
The Scripps Research Institute, La Jolla, California, USA

Word count - abstract: 250

Word count - text: 3945

24 **ABSTRACT**

25

26 Ebola virus (EBOV) entry into host cells comprises stepwise and extensive interactions  
27 of the sole viral surface glycoprotein GP with multiple host factors. During the intricate  
28 process, following virus uptake and trafficking to late endosomal/lysosomal  
29 compartments, GP is proteolytically processed to GP<sub>CL</sub> by the endosomal proteases  
30 cathepsin B and L unmasking GP's receptor-binding site. Engagement of GP<sub>CL</sub> with the  
31 universal filoviral intracellular receptor Niemann-Pick C1 (NPC1) eventually culminates in  
32 fusion between viral and cellular membranes, cytoplasmic escape of the viral  
33 nucleocapsid and subsequent infection. Mechanistic delineation of the indispensable  
34 GP<sub>CL</sub>:NPC1 binding step has been severely hampered by the unavailability of a robust  
35 cell-based assay assessing interaction of GP<sub>CL</sub> with full-length endosomal NPC1.

36 Here, we describe a novel *in situ* assay to monitor GP<sub>CL</sub>:NPC1 engagement in intact,  
37 infected cells. Visualization of the subcellular localization of binding complexes is based  
38 on the principle of DNA-assisted, antibody-mediated proximity ligation. Virus-receptor  
39 binding monitored by proximity ligation was contingent on GP's proteolytic cleavage,  
40 and was sensitive to perturbations in the GP<sub>CL</sub>:NPC1 interface. Our assay also  
41 specifically decoupled detection of virus-receptor binding from steps post-receptor  
42 binding, such as membrane fusion and infection. Testing of multiple FDA-approved small  
43 molecule inhibitors revealed that drug treatments inhibited virus entry and GP<sub>CL</sub>:NPC1  
44 recognition by distinctive mechanisms. Together, here we present a newly established  
45 proximity ligation assay, which will allow us to dissect cellular and viral requirements for

46 filovirus-receptor binding, and to delineate the mechanisms of action of inhibitors on  
47 filovirus entry in a cell-based system.

48

## 49 **IMPORTANCE**

50

51 Ebola virus causes episodic but increasingly frequent outbreaks of severe disease in  
52 Middle Africa, as shown by a currently ongoing outbreak in the Democratic Republic of  
53 Congo. Despite considerable effort, FDA-approved anti-filoviral therapeutics or targeted  
54 interventions are not available yet. Virus host-cell invasion represents an attractive target  
55 for antivirals; however our understanding of the inhibitory mechanisms of novel  
56 therapeutics is often hampered by fragmented knowledge of the filovirus-host molecular  
57 interactions required for viral infection. To help close this critical knowledge gap, here,  
58 we report an *in situ* assay to monitor binding of the EBOV glycoprotein to its receptor  
59 NPC1 in intact, infected cells. We demonstrate that our *in situ* assay based on proximity  
60 ligation represents a powerful tool to delineate receptor-viral glycoprotein interactions.  
61 Similar assays can be utilized to examine receptor interactions of diverse viral surface  
62 proteins whose studies have been hampered until now by the lack of robust *in situ*  
63 assays.

64

## 65 INTRODUCTION

66

67 Members of the family *Filoviridae*, including Ebola virus (EBOV), are emerging zoonotic  
68 pathogens that cause episodic but increasingly frequent outbreaks of a highly lethal  
69 disease in Middle Africa (1). Along with the big EBOV outbreak of 2014-16 in West Africa,  
70 the ongoing outbreak of EBOV disease in the Democratic Republic of Congo, the second  
71 largest outbreak on record with >3,400 confirmed cases and >2,200 deaths (as of April  
72 2020) and spill-over cases to neighboring Uganda highlight the potential of filoviruses to  
73 cause health emergencies of international scope (2). There is an urgent need for effective  
74 countermeasures; however, their development is hindered by our limited understanding  
75 of filovirus-host molecular interactions required for viral entry and infection.

76 The single filovirus-encoded spike glycoprotein (GP) is necessary and sufficient  
77 to mediate all steps in viral entry into host cells, culminating in cytoplasmic escape of  
78 the viral nucleocapsid. Following endocytosis, virions traffic to late  
79 endosomes/lysosomes (LE/LY) (3–6), where GP gains access to multiple essential host  
80 factors. GP is proteolytically processed by endosomal cysteine cathepsins B and L (CatB  
81 and CatL, respectively), which remove the heavily glycosylated C-terminal glycan cap  
82 and mucin domain sequences in the GP<sub>1</sub> subunit (7–9), thereby exposing a recessed  
83 receptor-binding site (RBS). This cleaved GP species (GP<sub>CL</sub>) binds domain C of Niemann-  
84 Pick C1 (NPC1), an ubiquitously expressed cholesterol transporter embedded in  
85 endo/lysosomal membranes that acts as an universal intracellular receptor for all  
86 filoviruses (10–14). Although GP<sub>CL</sub>:NPC1 recognition is a prerequisite for downstream  
87 steps in virus entry and infection, *in vitro* work suggests that NPC1 binding is not

88 sufficient to trigger large-scale conformational changes in GP or to initiate a subsequent  
89 merger of viral and host membranes (15, 16). Indeed, NPC1's precise role beyond GP  
90 binding, which presumably provides a physical link between virus particles and host  
91 membranes, remains elusive to date.

92         Because a robust cell-based assay assessing the interaction of GP<sub>CL</sub> with full-  
93 length endosomal NPC1 in its native context has been unavailable, mechanistic studies  
94 of this indispensable virus-receptor interaction have been largely limited to *in vitro*  
95 assays. These assays are predominantly based on a truncated, soluble form of a single  
96 domain in NPC1, domain C, as well as on *in vitro*-cleaved GPs (11, 12). However, studies  
97 with NPC1-targeting inhibitors suggest that these assays do not fully recapitulate the  
98 authentic interaction(s) between *in situ*-cleaved GP and full-length NPC1 in its membrane  
99 context within late endosomes and/or lysosomes (16). To address this gap, we describe  
100 herein an *in situ* assay to monitor GP<sub>CL</sub>:NPC1 binding in individual endosomal  
101 compartments of intact, infected cells by using DNA-guided, antibody-mediated  
102 proximity ligation. We employed this assay to show that GP<sub>CL</sub>:NPC1 interaction is  
103 restricted to the lumina of NPC1<sup>+</sup> LE/LY, is contingent on the proteolytic cleavage of GP  
104 and is sensitive to the mutational disruption of the GP<sub>CL</sub>:NPC1 interface. Testing of  
105 multiple FDA-approved small molecule inhibitors in our assay revealed that drug  
106 treatments inhibited virus entry and GP<sub>CL</sub>:NPC1 recognition by distinct mechanisms.  
107 Application of this assay will allow us to dissect the cellular and viral requirements for  
108 filovirus-receptor interaction, and to delineate the mechanisms of action of small  
109 molecule inhibitors on filovirus entry.

110 **RESULTS**

111

112 **Development of an assay visualizing EBOV GP: NPC1 binding in intact cells by *in***  
113 ***situ* proximity ligation**

114 During viral entry, proteolytically cleaved forms of EBOV GP (GP<sub>CL</sub>) interact with their  
115 critical endosomal receptor NPC1. We postulated that an *in situ* proximity ligation assay  
116 (PLA) could be used to monitor this essential binding step in intact cells. To detect viral  
117 particles, we used a recombinant vesicular stomatitis virus (rVSV) containing the viral  
118 phosphoprotein P linked to a fluorescent monomeric NeonGreen (mNG-P) protein, and  
119 bearing EBOV GP (17). Viral particles were allowed to attach at 4°C to U2OS human  
120 osteosarcoma cells stably expressing NPC1 tagged with a blue fluorophore, eBFP2 (17),  
121 and the cells were then shifted to 37°C to allow synchronized viral internalization.  
122 Visualization of fixed U2OS<sup>NPC1-eBFP2</sup> cells by fluorescence microscopy revealed that most  
123 internalized viral particles reached NPC1-containing late endosomes (NPC1<sup>+</sup> LE) within  
124 60 min (Fig. 1).

125 To detect closely apposed GP<sub>CL</sub> and NPC1 molecules in infected cells, we  
126 incubated them with oligonucleotide-linked monoclonal antibodies directed against  
127 each protein: GP's highly conserved receptor-binding site (RBS), unmasked by  
128 proteolytic cleavage to GP<sub>CL</sub> in endosomes, was detected with the RBS-specific  
129 antibody MR72 (17–19), and NPC1 was detected with the domain C-specific antibody  
130 mAb-548 (17). Circular DNA molecules were generated by oligonucleotide-guided  
131 proximity ligation, amplified *in situ* and visualized with a fluorophore-conjugated detector  
132 oligonucleotide (20, 21). PLA signal required the addition of both, MR72 and mAb-548

133 antibodies, and was only observed in cells that were allowed to internalize viral particles  
134 (Fig. S1). Also, PLA signal colocalized with VSV mNG-P particles bearing EBOV GP in  
135 the lumina of NPC1<sup>+</sup> LE (Fig. 1A). Proximity ligation and viral trafficking to NPC1<sup>+</sup> LE  
136 displayed similar kinetics—both peaked within 60 min post-viral uptake, followed by a  
137 plateau phase (Figs. 1A and B). Although most internalized viral particles trafficked to  
138 and colocalized with NPC1<sup>+</sup> compartments (Fig. 1B), only a subset of these VSV<sup>+</sup>/NPC1<sup>+</sup>  
139 vesicles also displayed PLA signal (Fig. 1B). Accordingly, in the following studies aimed  
140 at determining the viral and cellular requirements for proximity-dependent ligation of  
141 GP<sub>CL</sub>- and NPC1-specific antibodies, we routinely enumerated the number of  
142 VSV<sup>+</sup>/NPC1<sup>+</sup> compartments per cell, and reported the percentage of these  
143 compartments that were also positive for PLA signal (VSV<sup>+</sup>/NPC1<sup>+</sup>/PLA<sup>+</sup>).

144

#### 145 **Proximity ligation is sensitive to perturbations in the GP<sub>CL</sub>:NPC1 domain C interface**

146 Specific interactions of EBOV GP with NPC1 domain C have been mapped to amino  
147 acid residues in the GP<sub>1</sub> subunit that are exposed upon proteolytic cleavage (11, 18, 22).  
148 Mutations of the charged surface-exposed amino acids K114/K115 and the polar amino  
149 acid T83 led to significant defects in NPC1 binding and viral entry (5, 18). To determine  
150 if these mutations impact proximity ligation, we exposed cells to VSVs bearing  
151 GP<sup>T83M/K114E/K115E</sup>. Virions were efficiently trafficked to NPC1<sup>+</sup> LE and underwent GP<sub>1</sub>  
152 cleavage, as indicated by detection of the GP<sub>1</sub> RBS with the mAb MR72. However, viral  
153 infectivity was greatly diminished (Figs. S2A and S2B). Concordantly, we observed  
154 significant reduction of VSV<sup>+</sup>/NPC1<sup>+</sup>/PLA<sup>+</sup> colocalization, suggesting that GP<sub>CL</sub>:NPC1  
155 engagement in LE is necessary for PLA signal formation (Fig. 2A).

156           The small molecule filovirus entry inhibitor 3.47 was described to block EBOV GP-  
157 dependent entry and infection potentially by interfering with GP<sub>CL</sub>:NPC1 recognition (12).  
158 Accordingly, we directly compared the effect of 3.47 on viral entry in wild-type U2OS  
159 cells expressing basal levels of NPC1 against that in U2OS<sup>NPC1-eBFP2</sup> cells used for the  
160 PLA (Fig. 2C). Consistent with its activity as an NPC1-targeting inhibitor, and as shown  
161 previously, 3.47's antiviral activity was substantially attenuated in cells over-expressing  
162 NPC1, but we were nevertheless able to identify a concentration (1  $\mu$ M) that afforded  
163 ~50% inhibition of viral entry; higher concentrations of 3.47 were cytotoxic. Pre-  
164 treatment of U2OS<sup>NPC1-eBFP2</sup> cells with 3.47 at 1  $\mu$ M significantly reduced PLA signal (Fig.  
165 2B) but did not modify NPC1<sup>+</sup> LE morphology, block viral trafficking and GP cleavage,  
166 or influence detection by the assay antibodies, MR72 and mAb-548 (Fig. S2C). Our data  
167 that both genetic and pharmacological disruptions of the virus-receptor interface inhibit  
168 PLA strongly suggests that this assay indeed monitors GP<sub>CL</sub>:NPC1 domain C  
169 engagement in endosomal compartments.

170

### 171 **Detection of GP<sub>CL</sub>:NPC1 binding by PLA requires endosomal cleavage of GP**

172 Endosomal host cysteine cathepsins B and L (CatB and CatL, respectively) are key  
173 mediators of the entry-related GP $\rightarrow$ GPCL cleavage that is required for GPCL:NPC1  
174 binding and viral membrane fusion (5, 7–9). Their inactivation by pan-cysteine cathepsin  
175 inhibitors, including E-64 and E-64d, blocks filovirus entry ((7, 8); also see Fig. S3A).  
176 Concordantly, we found that pre-treatment of cells with E-64d abolished both GP  
177 cleavage (and consequently exposure of the GP<sub>1</sub> NPC1-binding site recognized by  
178 MR72; Fig. 3B) and GP<sub>CL</sub>:NPC1 engagement as measured by PLA (Fig. 3A). Intriguingly,



179 previous work has also hinted at the existence of cellular target(s) of E-64 in addition to  
180 CatB and CatL, whose inhibition imposes one or more blocks to viral entry (7, 8, 23, 24).  
181 To further investigate the cysteine protease-dependent EBOV entry mechanism, we  
182 generated *CatB/L*-knockout (KO) U2OS cell lines by CRISPR/Cas9 genome engineering  
183 (Fig. S4A). As expected, the *CatB/L*-KO cells lacked CatB and CatL activity and were  
184 substantially resistant to EBOV GP-dependent entry (Fig. S4B and C). Surprisingly,  
185 however, and in contrast to our findings in E-64d treated cells, viral particles underwent  
186 efficient exposure of the NPC1-binding site (and MR72 epitope) in GP in *CatB/L*-KO cells  
187 (Fig. 3B). Despite this apparent capacity for GP cleavage in the absence of CatB and  
188 CatL, viral particles were nevertheless unable to engage NPC1 as measured by PLA (Fig.  
189 3A).

190 GP priming in viral entry can be recapitulated *in vitro* by incubating rVSV bearing  
191 full-length EBOV GP with CatL or the bacterial protease thermolysin (THL) which mimics  
192 CatL/B cleavage (8); both cleave off GP<sub>1</sub> sequences corresponding to the glycan cap  
193 and mucin domain. Increased infectivity of viral particles bearing THL/CatL-cleaved GPs  
194 was reported previously, and can be attributed to improved cell binding of virions as well  
195 as increased accessibility of the GP's RBS for NPC1 domain C interaction ((7, 11, 25);  
196 also see Fig. S3B). *In vitro* cleavage of GP significantly enhanced GP<sub>CL</sub>:NPC1 domain C  
197 binding *in situ* by 1.5- to 2-fold indicating that proteolytic processing of GP is  
198 indispensable for detection of virus-receptor interaction by proximity ligation (Fig. 3C).  
199 In order to determine possible requirements for additional cysteine protease activity pre  
200 NPC1-binding, we evaluated proximity ligation with THL-cleaved GP in the presence of  
201 the pan-cysteine cathepsin inhibitor E-64d. Here, the absence of cysteine protease

202 proteolytic activity did not affect GP<sub>CL</sub>:NPC1 engagement (Fig. 3D), suggesting the  
203 existence of an E-64d-sensitive downstream entry block post-NPC1 binding, as  
204 previously proposed (5, 23).

205

### 206 ***In situ* proximity ligation decouples GP<sub>CL</sub>:NPC1 interaction from post-binding entry** 207 **steps**

208 As one of the critical steps in viral entry, GP:NPC1 interaction is the starting point for  
209 subsequent post-binding entry processes including, among others, membrane fusion  
210 triggering, cytoplasmic nucleocapsid escape and infection (5, 10–12). To examine if the  
211 established *in situ* PLA selectively monitored GP<sub>CL</sub>:NPC1 engagement or, in addition,  
212 also downstream steps such as membrane fusion, we made use of an EBOV GP mutant  
213 harboring amino acid substitutions in the GP<sub>1</sub> internal fusion loop, GP<sup>L529A/I544A</sup>. Amino  
214 acids L529 and I544 were shown to form a fusogenic hydrophobic surface at the tip of  
215 the fusion loop and proposed to be crucial for insertion of the loop into host membranes  
216 and subsequent membrane fusion steps (26, 27). Late-endosomal delivery of VSV  
217 bearing GP<sup>L529A/I544A</sup> and exposure of GP's RBS did not differ substantially from those of  
218 VSV harboring wild-type GP. However, steps post NPC1-binding, including membrane  
219 fusion triggering and virus infection were inhibited ((5); also see Fig. S5A). Consistent  
220 with these observations, *in situ* proximity ligation of VSV bearing GP<sup>L529A/I544A</sup> resembled  
221 that obtained with VSV decorated with wild-type GP (Fig. 4A).

222 Previous work identified a variety of antibodies with neutralizing activity against  
223 EBOV. Those displaying exceptional neutralizing potency were described to target  
224 conformational epitopes located in the base subdomain of the GP trimeric complex (28–

225 32). It was proposed that these base-binding antibodies efficiently block fusogenic  
226 rearrangements of GP, thereby inhibiting viral entry steps downstream of NPC1 binding.  
227 We used these neutralizing antibodies to further investigate if *in situ* PLA monitored  
228 GP<sub>CL</sub>:NPC1 binding specifically or also integrated post-receptor binding events (e.g.,  
229 viral membrane fusion). We tested antibodies targeting the GP<sub>1</sub>-GP<sub>2</sub> interface (KZ52,  
230 mAb100), the GP<sub>1</sub>-GP<sub>2</sub> interface plus the glycan cap (ADI-15946), or a subdomain of the  
231 fusion loop, the heptad repeat 2 (ADI-16061). Pre-incubation of VSVs with these  
232 neutralizing antibodies (50 µg/mL) afforded delivery of virus:antibody complexes to  
233 NPC1<sup>+</sup> LE, but did not hinder virus trafficking to LEs itself or proteolytic processing to  
234 GP<sub>CL</sub> (Fig. 4B, right panel and Fig. S5B-C). However, infection was blocked under these  
235 conditions, as expected (Fig. 4B, left panel). Despite their potent neutralizing activity,  
236 and consistent with the specified target epitopes as well as previously reported *in vitro*  
237 NPC1-binding studies (28–32), base-binding antibodies mAb100 and ADI-15946 had  
238 little or no effect on *in situ* PLA, consistent with our hypothesis that this assay selectively  
239 detects GP<sub>CL</sub>:NPC1 complex formation (Fig. 4C). Surprisingly, incubation with KZ52 and  
240 ADI-16061 slightly improved PLA signal, possibly because they enhanced an upstream  
241 step: the delivery of VSV bearing GP<sub>CL</sub> to NPC1<sup>+</sup> LE (Fig. 4C).

242 Collectively, our results provide strong evidence that the *in situ* PLA specifically  
243 monitors GP<sub>CL</sub>:NPC1 binding in infected cells and decouples the detection of virus-  
244 receptor binding from post-receptor binding steps in viral entry.

245

246 **Small molecule inhibitor-mediated selective interference of GP:GPC1 binding**  
247 **delineated by *in situ* PLA**

248 The unprecedented EBOV outbreak in West Africa 2013-16 uncovered a pressing need  
249 for anti-EBOV therapeutics; since then, numerous studies screened for and  
250 characterized FDA-approved drugs with anti-filoviral activity. The most promising drug  
251 candidates, amiodarone, bepridil, clomifene, sertraline, and toremifene were reported to  
252 block one or several steps during EBOV entry (16, 33–38). As their precise mechanisms  
253 of anti-EBOV activity still remain elusive, we examined the capacity of these inhibitors to  
254 alter intracellular GPC<sub>CL</sub>:NPC1 interaction in the PLA. As a control, we also tested the well  
255 characterized amphiphilic drug U18666A, which was described to block cholesterol  
256 export from lysosomes and shown to inhibit EBOV entry at higher concentrations, but  
257 not to impact GPC<sub>CL</sub>:NPC1 binding *in vitro* (10, 16, 39).

258 We first titrated the drugs in an EBOV entry assay in wild-type U2OS and  
259 U2OS<sup>NPC1-eBFP2</sup> cells over-expressing NPC1 employed in the PLA (Fig. 5A). Several of the  
260 inhibitors were less potent in NPC1-overexpressing cells than in wild-type cells, as  
261 reported previously, suggesting they act via the GPC<sub>CL</sub>:NPC1 axis ((16); also see Fig. S6A).  
262 Some inhibitors hampered VSV trafficking to NPC1<sup>+</sup> LE, whereas others had little or no  
263 effect on viral delivery to NPC1<sup>+</sup> LE compared to a DMSO-treated control (Fig. S6B).  
264 Because these trafficking defects likely contribute to the observed inhibition in infection,  
265 we sought to discount these trafficking effects on GPC<sub>CL</sub>:NPC1 binding by focusing  
266 exclusively on PLA activity in VSV<sup>+</sup>/NPC1<sup>+</sup> compartments. Importantly, these inhibitors  
267 exhibited little or no effect on GP cleavage (detected by MR72) or the accessibility of  
268 NPC1 domain C (detected by mAb-548; Fig. 5C and Fig. S6C).

269           Screening the inhibitory agents via PLA revealed that amiodarone, bepridil,  
270 clomifene, sertraline, and toremifene all significantly interfered with GP<sub>CL</sub>:NPC1  
271 interaction as compared to a DMSO-treated control (Fig. 5B). By contrast, but consistent  
272 with previous *in vitro* data, U18666A did not block GP<sub>CL</sub>:NPC1 binding (Fig. 5B). The drug  
273 treatments also substantially modified NPC1 trafficking to LE and/or LE localization: we  
274 observed pronounced imbalances in NPC1 distribution, illustrated by LE vesicles with  
275 extensively elevated or decreased NPC1 levels accumulating in the perinuclear regions  
276 of cells (Fig. 5C and S6C). Further, NPC1's transporter activity was strongly impaired:  
277 although cells did not exhibit cholesterol accumulation in NPC1<sup>+</sup> LE following the short-  
278 term drug treatments carried out prior to PLA measurements, prolonged inhibitor  
279 incubations (16 h instead of 1 h incubation prior to PLA) clearly blocked cholesterol  
280 clearance from LE (Fig. 5C and Fig. S6C, upper panel).

281           In summary, our results imply that a number of FDA-approved small molecule  
282 inhibitors interfere with GP<sub>CL</sub>:NPC1 engagement, and such block downstream viral entry  
283 steps. However, our findings and previously published work indicate that the inhibitory  
284 mode of action of these compounds is likely multifactorial. Although our data suggests  
285 that some of the compounds directly affect GP<sub>CL</sub>:NPC1 interaction in endosomal  
286 compartments during entry, they also uncover contributions from drug-induced changes  
287 in the morphology and distribution of NPC1<sup>+</sup> compartments.

288

## 289 **DISCUSSION**

290

291 Interaction of the filovirus spike protein GP with its universal intracellular receptor NPC1  
292 is indispensable for viral entry and infection (10–14). However, our understanding of the  
293 mechanism of GP:NPC1 recognition is largely derived from *in vitro* assays that use  
294 detergent-extracted NPC1 or a soluble form of the GP-interacting domain C of NPC1  
295 and *in vitro*-cleaved GP<sub>CL</sub> (11, 12). Although powerful, these assays likely do not fully  
296 recapitulate the authentic virus-receptor interaction in late endo/lysosomal  
297 compartments. As a case in point, a number of small molecule entry inhibitors that  
298 appear to target NPC1 in cells do not block GP<sub>CL</sub>:NPC1 domain C interaction *in vitro*,  
299 leaving questions about their mechanism of action open (16).

300 Here, we describe a novel assay that monitors the GP:NPC1 interaction in intact  
301 cells. Detection of the virus-receptor complexes *in situ* is based on the principle of DNA-  
302 assisted, antibody-mediated proximity ligation (20, 21). Several studies have used PLAs  
303 to detect interaction of viruses with host proteins at the plasma membrane (40), in the  
304 cytoplasm (41, 42) and early endosomes (43). To our knowledge, our assay represents  
305 the first example to afford visualization of protein-protein interactions in late  
306 endosomal/lysosomal compartments.

307 Previous studies used *in vitro* protease treatments in conjunction with infectivity  
308 measurements in protease inhibitor-treated or genetically engineered cells to establish  
309 a requirement for GP cleavage in EBOV entry (7–9). Further, *in vitro* binding studies with  
310 soluble NPC1 domains demonstrated that GP cleavage is required for virus-receptor  
311 interaction (10–14). Here, we used the PLA to directly investigate the role of GP

312 proteolytic cleavage in GP:NPC1 interaction within cellular endo/lysosomal  
313 compartments. Concordant with our current understanding, we found that blockade of  
314 all endosomal cysteine cathepsins with the pan-cysteine cathepsin inhibitor E-64d  
315 abrogated both GP cleavage and GP:NPC1 association *in situ* and that *in vitro* pre-  
316 cleavage of EBOV GP to GP<sub>CL</sub> significantly boosted this interaction. We also observed  
317 that genetic knockout of the two key cysteine cathepsins identified previously—CatB  
318 and CatL—substantially inhibited GP:NPC1 association as measured by PLA.  
319 Unexpectedly, knocking out *CatB* and *CatL* did not prevent exposure of the RBS in  
320 endosomes, as judged by the continued capacity of RBS-specific mAb MR72 to detect  
321 viral particles. Thus, one or more non-CatB/CatL cysteine cathepsins appear to at least  
322 partially cleave GP in endosomes in a manner that, however, does not permit stable  
323 GP:NPC1 association. Alternatively, it is possible, at least in principle, that CatB and/or  
324 CatL mediate additional yet undiscovered cleavage events that are required for  
325 GP:NPC1 binding.

326         Similar to published *in vitro* GP:NPC1 binding assays, our *in situ* PLA also  
327 specifically monitored GP:NPC1 interactions decoupling them from downstream post-  
328 binding steps allowing us to entirely focus on molecular mechanisms underlying the  
329 indispensable receptor binding. We employed fusion-blocking GP mutants and  
330 neutralizing antibodies targeting epitopes essential for GP's conformational  
331 rearrangements during membrane fusion; both interventions however left GP<sub>CL</sub>:NPC1  
332 binding measured by PLA largely unaffected. Previous publications suggested a dual  
333 mechanism of action for several of these antibodies, KZ52, mAb100, and ADI-15946 (28,  
334 30); to block EBOV GP-mediated infection they hampered post-NPC1-binding steps,

335 and interfered with GP's proteolytic processing *in vitro*. Surprisingly, the latter *in vitro*  
336 findings were not recapitulated by the *in situ* PLA. Our results suggest that in the  
337 presence of neutralizing antibodies the Cat B/L cleavage sites located in GP's  $\beta$ 13-14  
338 loop were readily accessible in an *in situ* endosomal environment while they did not  
339 appear to be in the *in vitro* cell-free system. While the RBS-specific mAb MR72 does not  
340 allow to monitor minor changes in GP cleavage efficiency, our PLA results indicate  
341 sufficient cleavage to allow efficient NPC1 binding. Further, our experiments suggest  
342 that *in vitro* cleavage studies do not adequately recapitulate the authentic interactions  
343 within the trifecta of endosomal proteases, virus glycoproteins and GP-targeting mAbs  
344 in an acidic endosomal environment.

345         Lastly, by examining the effect of small molecule inhibitors on GP<sub>CL</sub>:NPC1 binding,  
346 we further unraveled their multifaceted mechanisms of inhibitory action towards EBOV  
347 GP-mediated infection. All FDA-approved drugs tested, amiodarone, bepridil, clomifene,  
348 sertraline, and toremifene, significantly hampered GP<sub>CL</sub>:NPC1 interaction measured by  
349 *in situ* PLA. Previous reports focused on bepridil, sertraline and toremifene destabilizing  
350 the GP's prefusion conformation by binding to a cavity at the interface of GP<sub>1</sub> and GP<sub>2</sub>  
351 *in silico* (35, 38). Our data also indicated striking changes in the intracellular distribution  
352 and morphology of NPC1<sup>+</sup> LE/LY, as well as NPC1's cholesterol transporter function  
353 which was most notable for toremifene, clomifene, and sertraline suggesting they (in  
354 addition) also acted via the GP<sub>CL</sub>:NPC1 axis; overexpression of NPC1 clearly  
355 counteracted their inhibitory mechanism during infection. We propose that the loss of  
356 GP<sub>CL</sub>:NPC1 binding is most likely caused by adverse effects on both, NPC1 and GP,  
357 leading to destabilization of GP and drastic modifications in the NPC1<sup>+</sup> LE/LY phenotype.



358 Resolving the effects of small molecule inhibitors on GP<sub>CL</sub>:NPC1 binding remains the  
359 focus of ongoing work and will help us to decode this interaction in more detail.

360 In summary, the newly established *in situ* proximity ligation assay represents a  
361 powerful tool to delineate molecular mechanisms underlying receptor-filoviral  
362 glycoprotein interactions, to characterize host factors modulating EBOV entry, and to  
363 unravel the mode of action of antibodies and small molecule inhibitors in a cell-based  
364 system. Our data indicates that *in vitro* and *in silico* studies, while informative, have  
365 severe limitations in adequately recapitulating authentic receptor-glycoprotein  
366 interactions in host cells. Hence, we propose to modify and translate the employed *in*  
367 *situ* assay to unravel the receptor interactions of diverse viral surface proteins.

368

## 369 MATERIAL AND METHODS

370

371 **Cells and viruses.** Human osteosarcoma U2OS cells were cultured in modified McCoy's  
372 5A medium (Life Technologies) supplemented with 10% fetal bovine serum (Atlanta  
373 Biologicals), 1% penicillin-streptomycin (Life Technologies), and 1% GlutaMax (Life  
374 Technologies). Cells were kept at 37°C with 5% CO<sub>2</sub> in a humidified incubator. U2OS  
375 cells stably overexpressing NPC1-eBFP2 were generated as described previously and  
376 maintained under the same conditions mentioned above (17). Propagation of  
377 recombinant vesicular stomatitis Indiana virus (rVSV) expressing eGFP in the first  
378 position and bearing the VSV G or EBOV GP glycoprotein, derived from  
379 EBOV/H.sap/COD/76/Yam-Mayinga (EBOV “Mayinga” isolate) as well as an rVSV

380 bearing the EBOV GP glycoprotein, and an mNeongreen-phosphoprotein P (mNG-P)  
381 fusion protein has been described previously (5, 44–46). Pseudotyped VSVs bearing  
382 mNG-P and variant GPs, GP<sup>T83M/K114E/K115E</sup> and GP<sup>L529A/I544A</sup> (both also lacking the mucin-  
383 like domain), were prepared as previously reported (7, 24, 47).

384 For some experiments, cleaved viral particles bearing GP<sub>CL</sub> were first generated  
385 by incubation with thermolysin (THL, 1 mg/ml, pH 7.5, 37°C for 1h; Sigma) or  
386 recombinant human cathepsin L (CatL, 2 ng/ul, pH 5.5, 37°C for 1h; R&D Systems) as  
387 described previously (5). Reactions were stopped by removal onto ice and addition of  
388 phosphoramidon (1 mM; Peptides International) or E-64 (10 µm; Peptides International),  
389 respectively. While viral particles cleaved with CatL were used immediately, THL-cleaved  
390 virus was kept at -80°C until usage.

391

392 **Antibodies.** For immunofluorescence analysis, NPC1-eBFP2 was detected by a rabbit  
393 anti-BFP antibody (GeneTex) followed by a secondary anti-rabbit antibody-Alexa 405 or  
394 -Alexa 488 fluorophore (Thermo Scientific). During proximity ligation assay (PLA), NPC1  
395 was detected by mAb-548, whose generation was described earlier (17). Detection of  
396 proteolytically cleaved GP was carried out with a RBS-specific human anti GP antibody,  
397 MR72, either followed by a secondary anti-human antibody-Alexa 555 fluorophore or  
398 following the PLA protocol as described below. To detect EBOV GP by  
399 immunofluorescence analysis and to determine the effect of GP-targeting antibodies on  
400 GP<sub>CL</sub>:NPC1 interaction we used the previously described human anti-GP antibodies  
401 KZ52, mAb100, ADI-15946, and ADI-16061 (28–32). For production of KZ52, ADI-15946,  
402 and ADI-16061, variable heavy- and light-chain domain sequences were cloned into the

403 mammalian expression vectors pMAZ-IgL (encoding for the expression cassette of  
404 human  $\kappa$  light-chain constant domains) and pMAZ-IgH (encoding for the expression  
405 cassette of human  $\gamma$ 1 chain constant domains). Antibody production in FreeStyle™ 293-  
406 F cells (ThermoFisher) and subsequent purification were carried out as described earlier  
407 (17).

408

409 **Inhibitors.** Stock solutions of drugs were prepared in dimethyl sulfoxide (DMSO) and  
410 stored as frozen aliquots until use. Cells were incubated with 3.47 (Microbiotix),  
411 Amiodarone (Sigma), Bepridil (Sigma), Clomifene (Sigma), Sertraline (Toronto Research  
412 Chemicals), or Toremfifene (Sigma) for 1 h or 16 h at 37°C with concentrations as  
413 indicated. Incubation of cells with E-64d (Peptides International) was extended to 6 h at  
414 37°C, while cells were not preincubated with U18666A (Calbiochem) for PLA, but  
415 preincubated for 1 h or 16 h at 37°C for additional described experiments at  
416 concentrations indicated. Inhibitors were maintained at the same concentrations during  
417 virus spin-oculation and virus entry into cells.

418

419 **Generation of U2OS *CatB/L* double knockout cells overexpressing NPC1.** U2OS  
420 cells were transduced with a lentivirus carrying human codon-optimized *Streptomyces*  
421 *pyogenes* Cas9 (spCas9) and blasticidin resistance genes to generate U2OS-Cas9 cells  
422 expressing Cas9. Briefly, 293FT cells were co-transfected with Cas9-expressing plasmid  
423 lentiCas9-Blast (Addgene #52962, a gift from Feng Zhang), the lentiviral packaging  
424 plasmid psPAX2 (Addgene #12260, a gift from Didier Trono) and a VSV G expressing  
425 plasmid. The supernatant filtered through a 0.45  $\mu$ m filter was used to transduce U2OS

426 cells in the presence of 6 µg/ml of polybrene and transduced cells were selected with 15  
427 µg/ml of blasticidin. A lentiGuide-Puro plasmid (Addgene plasmid #52963, a gift from  
428 Feng Zhang) expressing human *CatL*-targeting sgRNA (5'-  
429 CTTAGGGATGTCCACAAAGC-3', targets anti-sense strand, nt 1021-1040 of the *CatL*  
430 transcript variant 1 mRNA or nt 4205-4186 of *CatL* gene ID 1514) was used to generate  
431 lentiviruses as described above. U2OS-Cas9 cells transduced with these lentiviruses  
432 were selected with 2 µg/ml of puromycin. Editing of the *CatL* gene was confirmed by  
433 Sanger sequencing of a 673-bp amplicon using primers flanking the sgRNA target site.  
434 A single cell clone carrying a homozygous deletion of 15 nucleotides that is predicted to  
435 disrupt a critical N-glycosylation site (204-NDT-206) that is required for lysosomal  
436 targeting of *CatL* by causing a T206I change (along with a deletion of aa 207-210) was  
437 selected (48, 49). Absence of wild-type allele from the *CatL* knockout (KO) cells was  
438 confirmed by RT-PCR using primers specific for the 15-nt deletion. To generate the  
439 *CatB/L* double KO, the *CatL*-KO cells were further transduced with a lentivirus encoding  
440 *CatB*-specific sgRNA (5'-TTGACCAGCTCATCCGACAG-3', targets anti-sense strand, nt  
441 251-270 of human *CatB* transcript variant 1 mRNA or nt 14,791-14,772 of human *CatB*  
442 gene ID 1508). A single cell clone carrying an insertion of a single nucleotide (T) that is  
443 predicted to cause a frame-shift leading to a truncated pro-peptide of 28 amino acids  
444 (frame shift at aa position 27) was selected. Absence of *CatB* and *CatL* activity in this  
445 single cell clone was confirmed by cathepsin activity assays (described below). Stable  
446 U2OS cells expressing NPC1 C-terminally tagged with a triple flag sequence in the  
447 *CatB/L*-KO background were generated as described earlier. In short, retroviruses  
448 packaging the transgene were produced by triple transfection of 293T cells, and target

449 U2OS cells were directly exposed to sterile-filtered retrovirus-laden supernatants in the  
450 presence of polybrene (6  $\mu\text{g/ml}$ ). Transduced cell populations were selected with  
451 puromycin (2  $\mu\text{g/ml}$ ) and expression of flag-tagged NPC1 was confirmed by  
452 immunostaining with an anti-Flag M2 antibody (Sigma).

453

454 **Cathepsin L and B activity assay.** U2OS-Cas9, U2OS *CatL*-KO, U2OS *CatB*-KO, and  
455 U2OS *CatB/L*-KO cells stably expressing flag-tagged NPC1 were lysed (50 mM MES [pH  
456 5.5], 135 mM NaCl, 2 mM ethylenediaminetetraacetic acid [EDTA], 0.5% Triton X-100)  
457 for 1 h on ice. As a control, cleared U2OS-Cas9 lysates were pre-incubated with the  
458 protease inhibitor E-64 (20  $\mu\text{M}$ ; Peptides International) for 20 min at room temperature  
459 (when indicated). Then, lysates were mixed with reaction buffer (100 mM NaAcetate [pH  
460 5], 1 mM EDTA, 4 mM dithiothreitol), incubated with the fluorogenic peptide substrate Z-  
461 FR-AMC (150  $\mu\text{M}$ ; R&D Systems) and measured at a fluorometer following a 0 to 30 min  
462 incubation ( $\lambda_{\text{Ex}} = 390 \text{ nm}$ ,  $\lambda_{\text{Em}} = 460 \text{ nm}$ ). Measurements of substrate hydrolysis were  
463 normalized to maximum hydrolysis on U2OS-Cas9 cells reached after 30 min; data  
464 represents the mean value and standard deviations of three independent experiments ( $n$   
465 = 3).

466

467 **Infection experiments.** Confluent U2OS cells were infected with pre-titrated amounts  
468 of pseudotyped VSV particles bearing wild-type or mutant GPs. Prior to infection, VSVs  
469 were diluted in corresponding media, and infected cells were maintained at 37°C for 14  
470 to 16 h post infection before manual counting of eGFP<sup>+</sup> and mNG<sup>+</sup> cells or automated  
471 counting using a Cytation 5 cell imaging multi-mode reader (BioTek Instruments) and a

472 CellInsight CX5 imager (Thermo Fisher) including onboard software. When indicated,  
473 cells were pre-incubated with small molecule inhibitors diluted in corresponding media;  
474 for antibody neutralization experiments, VSV particles were incubated with increasing  
475 concentrations of test Ab at room temperature for 1 h, prior to addition to cell  
476 monolayers. Virus infectivities were measured as described above. Virus neutralization  
477 data was subjected to nonlinear regression analysis (4-parameter, variable slope  
478 sigmoidal dose-response equation; GraphPad Prism).

479

480 **Immunofluorescence microscopy and immunostaining.** To investigate determinants  
481 of VSV mNG-P EBOV GP internalization into endosomal compartments, pre-titrated  
482 amounts of VSV particles bearing mNG-P and either wild-type or mutant EBOV GP were  
483 diluted into imaging buffer (20 mM HEPES [pH 7.4], 140 mM NaCl, 2.5 mM KCl, 1.8 mM  
484 CaCl<sub>2</sub>, 1 mM MgCl<sub>2</sub>, 5 mM glucose, 2% FBS), and spin-oculated onto pre-chilled  
485 U2OS<sup>NPC1-eBFP2</sup> cells on coverslips. Unbound virus was removed by washing with cold  
486 PBS. Cells were then placed in warm imaging buffer, and allowed to internalize VSVs for  
487 1 h at 37°C. Cells were fixed with 3.7% paraformaldehyde and permeabilized with  
488 PBS/0.1% Triton X-100. NPC1-eBFP2 was detected with either primary mouse anti-  
489 NPC1 mAb-548 or rabbit anti-BFP antibodies and secondary anti-mouse or anti-rabbit  
490 antibody-Alexa 405 fluorophore conjugates, respectively (Thermo Scientific). Cleaved  
491 GP was detected with the primary mouse RBS-specific anti-GP antibody MR72 followed  
492 by secondary anti-mouse antibody-Alexa 555 fluorophore conjugate (Thermo Scientific).  
493 To investigate transport of IgGs bound to VSV particles into NPC1<sup>+</sup> endosomal  
494 compartments, VSV particles bearing mNG-P were preincubated with antibodies (50 or

495 100 µg/ml, respectively) for 1 h at room temperature, followed by internalization into  
496 target cells and detection by incubation with secondary anti-human-Alexa 555  
497 fluorophore conjugates (Thermo Scientific). Cells were examined by  
498 immunofluorescence analysis performed on an Axio Observer Z1 widefield  
499 epifluorescence microscope (Zeiss Inc.) equipped with an ORCA-Flash4.0 LT digital  
500 CMOS camera (Hamamatsu Photonics), a 63x/1.4 numerical aperture oil immersion  
501 objective and a DAPI (4',6-diamidino-2-phenylindole)/fluorescein isothiocyanate  
502 (FITC)/tetramethyl rhodamine isocyanate (TRITC)/Cy5 filter set. Images were processed  
503 in Photoshop (Adobe Systems).

504

505 **Cholesterol accumulation assay.** Cholesterol accumulation following inhibitor  
506 treatment of U2OS<sup>NPC1-eBFP2</sup> cells was monitored by incubation with filipin (50 µg/ml;  
507 Sigma) for 1 h at room temperature. Cells were examined by immunofluorescence  
508 analysis as described under the method section 'Immunofluorescence microscopy and  
509 immunostaining'.

510

511 **Proximity Ligation Assay.** U2OS<sup>NPC1-eBFP2</sup> cells were allowed to internalize VSV particles  
512 (in the presence or absence of small molecule inhibitors or antibodies), fixed and  
513 permeabilized as described in the method section 'Immunofluorescence microscopy  
514 and immunostaining'. MR72, a RBS-targeting anti-GP mAb and mAb-548, an NPC1  
515 domain C-targeting mAb were directly labeled with Duolink<sup>®</sup> In Situ Probemaker PLUS  
516 and Duolink<sup>®</sup> In Situ Probemaker MINUS (Sigma) following the manufacturer's  
517 instructions. Fixed cells were incubated with labeled antibodies in a humidity chamber

518 at 37°C for 1 h. Excess antibody was removed by washing with Duolink® In Situ Wash  
519 Buffer (Sigma). GP: NPC1 interaction was detected by applying the Duolink® In Situ  
520 Detection Reagents Red kit following the manufacturer's instructions (Sigma). After  
521 removing excess reagents, NPC1-eBFP2 was detected using a rabbit anti-BFP antibody  
522 followed by a secondary anti-rabbit antibody-Alexa 405 fluorophore conjugate (Thermo  
523 Fisher). Cells were examined by immunofluorescence analysis as described under the  
524 method section 'Immunofluorescence microscopy and immunostaining'.

525

## 526 **ACKNOWLEDGMENTS**

527

528 We acknowledge Isabel Gutierrez, Estefania Valencia, Laura Polanco, and Cecelia  
529 Harold for laboratory management and technical support. This work was supported by  
530 National Institutes of Health (NIH) grant R01AI134824 (to K.C.). K.C. is a member of the  
531 Scientific Advisory Board of Integrum Scientific, LLC.

532

## 533 **REFERENCES**

534

- 535 1. Feldmann H, Geisbert TW. 2011. Ebola haemorrhagic fever. *Lancet*  
536 377:849–862.
- 537 2. WHO. 2020. Ebola Virus Disease - Democratic Republic of the Congo.  
538 External Situation Report 88.
- 539 3. Saeed MF, Kolokoltssov AA, Albrecht T, Davey RA. 2010. Cellular entry of  
540 ebola virus involves uptake by a macropinocytosis-like mechanism and subsequent



- 541 trafficking through early and late endosomes. *PLoS Pathog* 6:e1001110.
- 542 4. Mulherkar N, Raaben M, de la Torre JC, Whelan SP, Chandran K. 2011.
- 543 The Ebola virus glycoprotein mediates entry via a non-classical dynamin-dependent
- 544 macropinocytic pathway. *Virology* 419:72–83.
- 545 5. Spence JS, Krause TB, Mittler E, Jangra RK, Chandran K. 2016. Direct
- 546 visualization of ebola virus fusion triggering in the endocytic pathway. *MBio*
- 547 7:e01857-15.
- 548 6. Nanbo A, Imai M, Watanabe S, Noda T, Takahashi K, Neumann G,
- 549 Halfmann P, Kawaoka Y. 2010. Ebolavirus is internalized into host cells via
- 550 macropinocytosis in a viral glycoprotein-dependent manner. *PLoS Pathog*
- 551 6:e1001121.
- 552 7. Chandran K, Sullivan NJ, Felbor U, Whelan SP, Cunningham JM. 2005.
- 553 Endosomal proteolysis of the Ebola virus glycoprotein is necessary for infection.
- 554 *Science* 308:1643–1645.
- 555 8. Schornberg K, Matsuyama S, Kabsch K, Delos S, Bouton A, White J. 2006.
- 556 Role of endosomal cathepsins in entry mediated by the Ebola virus glycoprotein. *J*
- 557 *Virol* 80:4174–4178.
- 558 9. Misasi J, Chandran K, Yang J-Y, Considine B, Filone CM, Côté M, Sullivan
- 559 N, Fabozzi G, Hensley L, Cunningham J. 2012. Filoviruses require endosomal
- 560 cysteine proteases for entry but exhibit distinct protease preferences. *J Virol*
- 561 86:3284–3292.
- 562 10. Carette JE, Raaben M, Wong AC, Herbert AS, Obernosterer G, Mulherkar
- 563 N, Kuehne AI, Kranzusch PJ, Griffin AM, Ruthel G, Dal Cin P, Dye JM, Whelan SP,

- 564 Chandran K, Brummelkamp TR. 2011. Ebola virus entry requires the cholesterol  
565 transporter Niemann-Pick C1. *Nature* 477:340–343.
- 566 11. Miller EH, Obernosterer G, Raaben M, Herbert AS, Deffieu MS, Krishnan  
567 A, Ndungo E, Sandesara RG, Carette JE, Kuehne AI, Ruthel G, Pfeffer SR, Dye  
568 JM, Whelan SP, Brummelkamp TR, Chandran K. 2012. Ebola virus entry requires  
569 the host-programmed recognition of an intracellular receptor. *EMBO J* 31:1947–  
570 1960.
- 571 12. Côté M, Misasi J, Ren T, Bruchez A, Lee K, Filone CM, Hensley L, Li Q,  
572 Ory D, Chandran K, Cunningham J. 2011. Small molecule inhibitors reveal  
573 Niemann-Pick C1 is essential for Ebola virus infection. *Nature* 477:344–348.
- 574 13. Ng M, Ndungo E, Jangra RK, Cai Y, Postnikova E, Radoshitzky SR, Dye  
575 JM, Ramírez de Arellano E, Negredo A, Palacios G, Kuhn JH, Chandran K. 2014.  
576 Cell entry by a novel European filovirus requires host endosomal cysteine proteases  
577 and Niemann-Pick C1. *Virology* 468–470:637–646.
- 578 14. Goldstein T, Anthony SJ, Gbakima A, Bird BH, Bangura J, Tremeau-  
579 Bravard A, Belaganahalli MN, Wells HL, Dhanota JK, Liang E, Grodus M, Jangra  
580 RK, DeJesus VA, Lasso G, Smith BR, Jambai A, Kamara BO, Kamara S, Bangura  
581 W, Monagin C, Mazet JAK. 2018. The discovery of Bombali virus adds further  
582 support for bats as hosts of ebolaviruses. *Nat Microbiol* 3:1084–1089.
- 583 15. Bale S, Liu T, Li S, Wang Y, Abelson D, Fusco M, Woods VL, Saphire EO.  
584 2011. Ebola virus glycoprotein needs an additional trigger, beyond proteolytic  
585 priming for membrane fusion. *PLoS Negl Trop Dis* 5:e1395.
- 586 16. Shoemaker CJ, Schornberg KL, Delos SE, Scully C, Pajouhesh H, Olinger

- 587 GG, Johansen LM, White JM. 2013. Multiple cationic amphiphiles induce a  
588 Niemann-Pick C phenotype and inhibit Ebola virus entry and infection. PLoS ONE  
589 8:e56265.
- 590 17. Wec AZ, Nyakatura EK, Herbert AS, Howell KA, Holtsberg FW, Bakken RR,  
591 Mittler E, Christin JR, Shulenin S, Jangra RK, Bharrhan S, Kuehne AI, Bornholdt  
592 ZA, Flyak AI, Sapphire EO, Crowe JE, Aman MJ, Dye JM, Lai JR, Chandran K. 2016.  
593 A “Trojan horse” bispecific-antibody strategy for broad protection against  
594 ebolaviruses. *Science* 354:350–354.
- 595 18. Bornholdt ZA, Ndungo E, Fusco ML, Bale S, Flyak AI, Crowe JE, Chandran  
596 K, Sapphire EO. 2015. Host-Primed Ebola Virus GP Exposes a Hydrophobic NPC1  
597 Receptor-Binding Pocket, Revealing a Target for Broadly Neutralizing Antibodies.  
598 *MBio* 7.
- 599 19. Flyak AI, Ilinykh PA, Murin CD, Garron T, Shen X, Fusco ML, Hashiguchi T,  
600 Bornholdt ZA, Slaughter JC, Sapparapu G, Klages C, Ksiazek TG, Ward AB,  
601 Sapphire EO, Bukreyev A, Crowe JE. 2015. Mechanism of human antibody-mediated  
602 neutralization of Marburg virus. *Cell* 160:893–903.
- 603 20. Fredriksson S, Gullberg M, Jarvius J, Olsson C, Pietras K, Gústafsdóttir SM,  
604 Ostman A, Landegren U. 2002. Protein detection using proximity-dependent DNA  
605 ligation assays. *Nat Biotechnol* 20:473–477.
- 606 21. Gullberg M, Fredriksson S, Taussig M, Jarvius J, Gustafsdottir S,  
607 Landegren U. 2003. A sense of closeness: protein detection by proximity ligation.  
608 *Curr Opin Biotechnol* 14:82–86.
- 609 22. Wang H, Shi Y, Song J, Qi J, Lu G, Yan J, Gao GF. 2016. Ebola Viral

- 610 Glycoprotein Bound to Its Endosomal Receptor Niemann-Pick C1. *Cell* 164:258–  
611 268.
- 612 23. Fels JM, Spence JS, Bortz RH, Bornholdt ZA, Chandran K. 2019. A  
613 hyperstabilizing mutation in the base of the ebola virus glycoprotein acts at multiple  
614 steps to abrogate viral entry. *MBio* 10.
- 615 24. Wong AC, Sandesara RG, Mulherkar N, Whelan SP, Chandran K. 2010. A  
616 forward genetic strategy reveals destabilizing mutations in the Ebolavirus  
617 glycoprotein that alter its protease dependence during cell entry. *J Virol* 84:163–  
618 175.
- 619 25. Kaletsky RL, Simmons G, Bates P. 2007. Proteolysis of the Ebola virus  
620 glycoproteins enhances virus binding and infectivity. *J Virol* 81:13378–13384.
- 621 26. Brecher M, Schornberg KL, Delos SE, Fusco ML, Saphire EO, White JM.  
622 2012. Cathepsin cleavage potentiates the Ebola virus glycoprotein to undergo a  
623 subsequent fusion-relevant conformational change. *J Virol* 86:364–372.
- 624 27. Gregory SM, Harada E, Liang B, Delos SE, White JM, Tamm LK. 2011.  
625 Structure and function of the complete internal fusion loop from Ebolavirus  
626 glycoprotein 2. *Proc Natl Acad Sci USA* 108:11211–11216.
- 627 28. Misasi J, Gilman MSA, Kanekiyo M, Gui M, Cagigi A, Mulangu S, Corti D,  
628 Ledgerwood JE, Lanzavecchia A, Cunningham J, Muyembe-Tamfun JJ, Baxa U,  
629 Graham BS, Xiang Y, Sullivan NJ, McLellan JS. 2016. Structural and molecular  
630 basis for Ebola virus neutralization by protective human antibodies. *Science*  
631 351:1343–1346.
- 632 29. West BR, Wec AZ, Moyer CL, Fusco ML, Ilinykh PA, Huang K, Wirchnianski

- 633 AS, James RM, Herbert AS, Hui S, Goodwin E, Howell KA, Kailasan S, Aman MJ,  
634 Walker LM, Dye JM, Bukreyev A, Chandran K, Saphire EO. 2019. Structural basis  
635 of broad ebolavirus neutralization by a human survivor antibody. *Nat Struct Mol Biol*  
636 26:204–212.
- 637 30. Wec AZ, Herbert AS, Murin CD, Nyakatura EK, Abelson DM, Fels JM, He  
638 S, James RM, de La Vega M-A, Zhu W, Bakken RR, Goodwin E, Turner HL, Jangra  
639 RK, Zeitlin L, Qiu X, Lai JR, Walker LM, Ward AB, Dye JM, Bornholdt ZA. 2017.  
640 Antibodies from a Human Survivor Define Sites of Vulnerability for Broad Protection  
641 against Ebolaviruses. *Cell* 169:878-890.e15.
- 642 31. Bornholdt ZA, Turner HL, Murin CD, Li W, Sok D, Souders CA, Piper AE,  
643 Goff A, Shamblin JD, Wollen SE, Sprague TR, Fusco ML, Pommert KBJ, Cavacini  
644 LA, Smith HL, Klempner M, Reimann KA, Krauland E, Gerngross TU, Wittrup KD,  
645 Walker LM. 2016. Isolation of potent neutralizing antibodies from a survivor of the  
646 2014 Ebola virus outbreak. *Science* 351:1078–1083.
- 647 32. Lee JE, Fusco ML, Hessel AJ, Oswald WB, Burton DR, Saphire EO. 2008.  
648 Structure of the Ebola virus glycoprotein bound to an antibody from a human  
649 survivor. *Nature* 454:177–182.
- 650 33. Gehring G, Rohrmann K, Atenchong N, Mittler E, Becker S, Dahlmann F,  
651 Pöhlmann S, Vondran FWR, David S, Manns MP, Ciesek S, von Hahn T. 2014. The  
652 clinically approved drugs amiodarone, dronedarone and verapamil inhibit filovirus  
653 cell entry. *J Antimicrob Chemother* 69:2123–2131.
- 654 34. Johansen LM, DeWald LE, Shoemaker CJ, Hoffstrom BG, Lear-Rooney  
655 CM, Stossel A, Nelson E, Delos SE, Simmons JA, Grenier JM, Pierce LT, Pajouhesh

- 656 H, Lehár J, Hensley LE, Glass PJ, White JM, Olinger GG. 2015. A screen of  
657 approved drugs and molecular probes identifies therapeutics with anti-Ebola virus  
658 activity. *Sci Transl Med* 7:290ra89.
- 659 35. Ren J, Zhao Y, Fry EE, Stuart DI. 2018. Target Identification and Mode of  
660 Action of Four Chemically Divergent Drugs against Ebolavirus Infection. *J Med*  
661 *Chem* 61:724–733.
- 662 36. DeWald LE, Dyall J, Sword JM, Torzewski L, Zhou H, Postnikova E, Kollins  
663 E, Alexander I, Gross R, Cong Y, Gerhardt DM, Johnson RF, Olinger GG, Holbrook  
664 MR, Hensley LE, Jahrling PB. 2018. The calcium channel blocker bepridil  
665 demonstrates efficacy in the murine model of marburg virus disease. *J Infect Dis*  
666 218:S588–S591.
- 667 37. Johansen LM, Brannan JM, Delos SE, Shoemaker CJ, Stossel A, Lear C,  
668 Hoffstrom BG, Dewald LE, Schornberg KL, Scully C, Lehár J, Hensley LE, White  
669 JM, Olinger GG. 2013. FDA-approved selective estrogen receptor modulators inhibit  
670 Ebola virus infection. *Sci Transl Med* 5:190ra79.
- 671 38. Zhao Y, Ren J, Harlos K, Jones DM, Zeltina A, Bowden TA, Padilla-Parra  
672 S, Fry EE, Stuart DI. 2016. Toremifene interacts with and destabilizes the Ebola  
673 virus glycoprotein. *Nature* 535:169–172.
- 674 39. Lu F, Liang Q, Abi-Mosleh L, Das A, De Brabander JK, Goldstein JL, Brown  
675 MS. 2015. Identification of NPC1 as the target of U18666A, an inhibitor of lysosomal  
676 cholesterol export and Ebola infection. *elife* 4.
- 677 40. Cheshenko N, Pierce C, Herold BC. 2018. Herpes simplex viruses activate  
678 phospholipid scramblase to redistribute phosphatidylserines and Akt to the outer

- 679 leaflet of the plasma membrane and promote viral entry. PLoS Pathog  
680 14:e1006766.
- 681 41. Jambunathan N, Charles A-S, Subramanian R, Saied AA, Naderi M, Rider  
682 P, Brylinski M, Chouljenko VN, Kousoulas KG. 2015. Deletion of a Predicted  $\beta$ -  
683 Sheet Domain within the Amino Terminus of Herpes Simplex Virus Glycoprotein K  
684 Conserved among Alphaherpesviruses Prevents Virus Entry into Neuronal Axons.  
685 J Virol 90:2230–2239.
- 686 42. Zhang P, Monteiro da Silva G, Deatherage C, Burd C, DiMaio D. 2018. Cell-  
687 Penetrating Peptide Mediates Intracellular Membrane Passage of Human  
688 Papillomavirus L2 Protein to Trigger Retrograde Trafficking. Cell 174:1465-  
689 1476.e13.
- 690 43. Assetta B, Morris-Love J, Gee GV, Atkinson AL, O'Hara BA, Maginnis MS,  
691 Haley SA, Atwood WJ. 2019. Genetic and Functional Dissection of the Role of  
692 Individual 5-HT<sub>2</sub> Receptors as Entry Receptors for JC Polyomavirus. Cell Rep  
693 27:1960-1966.e6.
- 694 44. Takada A, Robison C, Goto H, Sanchez A, Murti KG, Whitt MA, Kawaoka  
695 Y. 1997. A system for functional analysis of Ebola virus glycoprotein. Proc Natl Acad  
696 Sci USA 94:14764–14769.
- 697 45. Whelan SP, Ball LA, Barr JN, Wertz GT. 1995. Efficient recovery of  
698 infectious vesicular stomatitis virus entirely from cDNA clones. Proc Natl Acad Sci  
699 USA 92:8388–8392.
- 700 46. Jeffers SA, Sanders DA, Sanchez A. 2002. Covalent modifications of the  
701 ebola virus glycoprotein. J Virol 76:12463–12472.

- 702 47. Kleinfelter LM, Jangra RK, Jae LT, Herbert AS, Mittler E, Stiles KM,  
703 Wirchnianski AS, Kielian M, Brummelkamp TR, Dye JM, Chandran K. 2015. Haploid  
704 genetic screen reveals a profound and direct dependence on cholesterol for  
705 hantavirus membrane fusion. *MBio* 6:e00801.
- 706 48. Smith SM, Kane SE, Gal S, Mason RW, Gottesman MM. 1989.  
707 Glycosylation of procathepsin L does not account for species molecular-mass  
708 differences and is not required for proteolytic activity. *Biochem J* 262:931–938.
- 709 49. Kane SE. 1993. Mouse procathepsin L lacking a functional glycosylation  
710 site is properly folded, stable, and secreted by NIH 3T3 cells. *J Biol Chem*  
711 268:11456–11462.

712

## 713 **FIGURE LEGENDS**

714

715 **Fig. 1.** Development of an EBOV GP: NPC1 binding assay in intact cells by *in situ*  
716 proximity ligation. **(A)** VSV mNG-P particles bearing EBOV GP were internalized into  
717 U2OS cells ectopically expressing NPC1-eBFP2 for 60 min. Cells were fixed,  
718 permeabilized and subjected to proximity ligation assay (PLA) using GP<sub>CL</sub>- and NPC1-  
719 specific antibodies (MR72/mAb-548). During amplification, resulting PLA products were  
720 labeled with a detector oligonucleotide conjugated with a red fluorophore. White  
721 arrowheads, VSV/NPC1 colocalization; red arrowheads, VSV/NPC1/PLA colocalization.  
722 **(B)** VSVs bearing EBOV GP were endocytosed into U2OS cells as described in (A), fixed  
723 at the indicated time points and subjected to PLA. VSV positive compartments (VSV<sup>+</sup>)  
724 were enumerated; the percentage of compartments also positive for NPC1 (VSV<sup>+</sup>/NPC1<sup>+</sup>)



725 or NPC1 plus PLA (VSV<sup>+</sup>/NPC1<sup>+</sup>/PLA<sup>+</sup>) were determined. Representative curves out of  
726 two independent experiments are shown; averages of pooled cells are displayed ( $n \geq 20$   
727 per time point).

728

729 **Fig. 2.** Proximity ligation is sensitive to perturbations in the GP<sub>CL</sub>:NPC1 domain C  
730 interface. **(A)** VSV mNG-P particles bearing EBOV GP or EBOV GP<sup>T83M/K114E/K115E</sup> were  
731 internalized into U2OS<sup>NPC1-eBFP2</sup> cells for 60 min followed by cell fixation, permeabilization  
732 and PLA. Cells were analyzed by fluorescence microscopy; data points represent the  
733 percentage of VSV<sup>+</sup>/NPC1<sup>+</sup>/PLA<sup>+</sup> compartments per individual cell; bars depict the  
734 pooled averages and standard deviations ( $\pm$  SD) for all cells from two independent  
735 experiments ( $n \geq 40$ ). An unpaired two-tailed t-test was used to compare  
736 VSV<sup>+</sup>/NPC1<sup>+</sup>/PLA<sup>+</sup> compartments of cells infected by VSV bearing either EBOV GP or  
737 EBOV GP<sup>T83M/K114E/K115E</sup> (\*\*\*\*,  $P < 0.0001$ ). Group means calculated from the percentage of  
738 VSV<sup>+</sup>/NPC1<sup>+</sup>/PLA<sup>+</sup> vesicles were compared by Cohen's  $d$  effect size ( $d > 1.3$ ). **(B)**  
739 U2OS<sup>NPC1-eBFP2</sup> cells were pre-incubated with the inhibitor 3.47 (1  $\mu$ M) for 60 min at 37°C,  
740 followed by VSV mNG-P EBOV GP uptake for 60 min and PLA. Data points were  
741 acquired and analyzed as described in (A). **(C)** After pre-incubation of U2OS<sup>NPC1-eBFP2</sup> and  
742 wild-type U2OS cells with increasing 3.47 concentrations, cells were infected with VSV  
743 mNG-P EBOV GP for 16 h. Infection was measured by automated counting of mNG<sup>+</sup>  
744 cells and normalized to infection obtained in the absence of 3.47. Averages  $\pm$  SD for six  
745 technical replicates pooled from two independent experiments are displayed. Data was

746 subjected to nonlinear regression analysis to derive 3.47 concentration at half-maximal  
747 inhibition of infection ( $IC_{50} \pm 95\%$  confidence intervals for nonlinear curve fit).

748

749 **Fig. 3.** Detection of GP<sub>CL</sub>:NPC1 binding by PLA requires endosomal cleavage of GP. **(A)**

750 VSV mNG-P particles bearing EBOV GP were incubated with either U2OS<sup>NPC1-eBFP2</sup> cells

751 pre-treated with E-64d (100mM, 6h at 37°C) (left panel), or U2OS *CatB/L*-KO cells

752 ectopically over- expressing flag-tagged NPC1 (right panel). Cells were fixed following

753 virus incubation (1 h at 37°C), permeabilized and subjected to PLA. Data points represent

754 the percentage of VSV<sup>+</sup>/NPC1<sup>+</sup>/PLA<sup>+</sup> compartments per individual cell; bars depict the

755 average  $\pm$ SD for all data points pooled from two independent experiments ( $n \geq 30$ ).

756 Points with reduced transparency represent values outside of the 10th-90th percentile.

757 An unpaired two-tailed t-test was used to compare VSV<sup>+</sup>/NPC1<sup>+</sup>/PLA<sup>+</sup> compartments of

758 wild-type cells with either inhibitor- treated (left) or KO (right) cells infected by EBOV GP-

759 decorated VSV (\*\*\*\*,  $P < 0.0001$ ). Group means calculated from the percentage of

760 VSV<sup>+</sup>/NPC1<sup>+</sup>/PLA<sup>+</sup> vesicles were compared by Cohen's  $d$  effect size. **(B)** Cells described

761 in (A) were exposed to VSV mNG-P EBOV GP uptake for 1h at 37°C. After fixation, viral

762 particles, NPC1 and GP<sub>CL</sub> were visualized by fluorescence microscopy. Representative

763 images from two independent experiments are shown. **(C)** VSV mNG-P particles bearing

764 EBOV GP were treated *in vitro* with thermolysin (THL) or cathepsin L (CatL), respectively.

765 Viral particles were taken up into U2OS<sup>NPC1-eBFP2</sup> cells, followed by fixing of the cells and

766 subjecting them to PLA. Data points represent the percentage of VSV<sup>+</sup>/NPC1<sup>+</sup>/PLA<sup>+</sup>

767 compartments per individual cell; bars depict the average  $\pm$ SD for all data points pooled

768 from two independent experiments ( $n \geq 25$ ). To compare VSV<sup>+</sup>/NPC1<sup>+</sup>/PLA<sup>+</sup>

769 compartments of cells which endocytosed VSV studded with either uncleaved or  
770 THL/CatL- cleaved GP, an unpaired two-tailed  $t$ -test was used (\*\*\*\*,  $P < 0.0001$ ). Cohen's  
771  $d$  effect size was used to compare the group means calculated from the percentages of  
772 VSV<sup>+</sup>/NPC1<sup>+</sup>/PLA<sup>+</sup> vesicles ( $d > 1.3$ ). (D) U2OS<sup>NPC1-eBFP2</sup> cells were (not) pre-incubated with  
773 E-64d (as described in [A]) and VSV mNG-P particles bearing EBOV GP were treated *in*  
774 *vitro* with THL. Following virus internalization into U2OS<sup>NPC1-eBFP2</sup>, cells were fixed and  
775 subjected to PLA. Data points represent the percentage of VSV<sup>+</sup>/NPC1<sup>+</sup>/PLA<sup>+</sup>  
776 compartments per individual cell; bars depict the average  $\pm$ SD for all data points pooled  
777 from two independent experiments ( $n \geq 25$ ). Points with reduced transparency represent  
778 values outside of the 10th-90th percentile. To compare VSV<sup>+</sup>/NPC1<sup>+</sup>/PLA<sup>+</sup> compartments  
779 of E-64d-treated cells with those of untreated cells which endocytosed VSV studded  
780 with either uncleaved or THL-cleaved GP, an unpaired two-tailed  $t$ -test was used (\*\*,  $P$   
781  $< 0.01$ ; \*\*\*,  $P < 0.001$ ; \*\*\*\*,  $P < 0.0001$ ). Cohen's  $d$  effect size was used to compare the  
782 group means calculated from the percentages of VSV<sup>+</sup>/NPC1<sup>+</sup>/PLA<sup>+</sup> vesicles.

783

784 **Fig. 4.** *In situ* proximity ligation decouples GP<sub>CL</sub>:NPC1 interaction from post-binding  
785 entry steps. (A) VSV mNG-P particles bearing EBOV GP or EBOV GP<sup>L529A/I544A</sup> were  
786 internalized into U2OS<sup>NPC1-eBFP2</sup> cells for 60 min followed by PLA. Data points represent  
787 the percentage of triple positive compartments per individual cell; bars depict the  
788 average  $\pm$ SD for all data points pooled from two independent experiments ( $n \geq 37$ ). Data  
789 analyses included an unpaired two-tailed  $t$ -test to compare VSV<sup>+</sup>/NPC1<sup>+</sup>/PLA<sup>+</sup> vesicles  
790 of cells which internalized VSV decorated with wild-type or mutant GP (ns,  $P > 0.05$ ).

791 Cohen's  $d$  effect size was used to compare the group means calculated from the  
792 percentages of VSV<sup>+</sup>/NPC1<sup>+</sup>/PLA<sup>+</sup> compartments. **(B)** ADI-15946 was incubated with  
793 VSV EBOV GP particles and exposed to U2OS<sup>NPC1-eBFP2</sup> (right panel). After virus uptake  
794 for 1 h at 37°C, cells were fixed and viral particles, NPC1 and bound antibodies were  
795 visualized by fluorescence microscopy. Representative images from two independent  
796 experiments are shown. Virions were preincubated with increasing amounts of KZ52,  
797 mAb100, ADI-15946 or ADI-16061 and then exposed to U2OS<sup>NPC1-eBFP2</sup> cells for 16 h at  
798 37°C (left panel). Number of infected cells was determined by automated counting of  
799 mNG<sup>+</sup> cells and normalized to infection obtained in the absence of antibodies. Averages  
800  $\pm$  SD for six technical replicates pooled from two independent experiments are shown.  
801 **(C)** VSV mNG-P EBOV GP virions were complexed with KZ52, mAb100, ADI-15946 or  
802 ADI-16061 (50  $\mu$ g/ml and 100  $\mu$ g/ml) for 1 h at room temperature. Following  
803 internalization into U2OS<sup>NPC1-eBFP2</sup>, cells were fixed, and subjected to *in situ* PLA. Data  
804 points represent the percentage of VSV<sup>+</sup>/NPC1<sup>+</sup>/PLA<sup>+</sup> compartments per individual cell;  
805 bars show the average  $\pm$ SD for all data points pooled from two independent experiments  
806 ( $n \geq 22$ ). VSV<sup>+</sup>/NPC1<sup>+</sup>/PLA<sup>+</sup> vesicles were analyzed by unpaired two-tailed t-test (ns,  $P >$   
807 0.05; \*,  $P < 0.05$ ; \*\*,  $P < 0.01$ ; \*\*\*\*,  $P < 0.0001$ ) comparing cells which were exposed to  
808 virion-antibody complexes to cells exposed to untreated virus. Group means calculated  
809 from the percentage of VSV<sup>+</sup>/NPC1<sup>+</sup>/PLA<sup>+</sup> vesicles were also compared by Cohen's  $d$   
810 effect size.

811

812 **Fig. 5.** Small molecule inhibitor-mediated selective interference of GP:NPC1 binding  
813 delineated by *in situ* PLA. **(A)** U2OS<sup>NPC1-eBFP2</sup> cells were preincubated with increasing

814 concentrations of amiodarone, bepridil, clomifene, sertraline, toremifene, and U18666A,  
815 respectively before exposed to VSV mNG-P EBOV GP for 16 h at 37°C. Infection was  
816 measured by automated counting of mNG<sup>+</sup> cells and normalized to infection obtained in  
817 the presence of vehicle only. Averages  $\pm$  SD for nine to eighteen technical replicates  
818 pooled from three to six independent experiments are displayed. **(B)** U2OS<sup>NPC1-eBFP2</sup> cells  
819 were incubated with amiodarone, bepridil, clomifene, and sertraline, respectively (2  $\mu$ M  
820 or 5  $\mu$ M, 1 h at 37°C), or toremifene (2  $\mu$ M or 10  $\mu$ M, 1 h at 37°C), or U18666A (10  $\mu$ M, 2  
821 h at 37°C), followed by VSV mNG-P EBOV GP uptake for 1 h. Cells were subjected to *in*  
822 *situ* PLA and analyzed by fluorescence microscopy. The percentage of triple positive  
823 VSV<sup>+</sup>/NPC1<sup>+</sup>/PLA<sup>+</sup> compartments per individual cell is represented by data points; bars  
824 show the average  $\pm$ SD for all data points pooled from two independent experiments ( $n$   
825  $\geq$  20). VSV<sup>+</sup>/NPC1<sup>+</sup>/PLA<sup>+</sup> vesicles were analyzed by unpaired two-tailed *t*-test (ns,  $P >$   
826 0.05; \*,  $P < 0.05$  ; \*\*\*\*,  $P < 0.0001$ ) comparing inhibitor-exposed to untreated cells. Group  
827 means calculated from the percentage of VSV<sup>+</sup>/NPC1<sup>+</sup>/PLA<sup>+</sup> compartments were also  
828 compared by Cohen's *d* effect size. **(C)** Table summarizing results from Fig. 5B and Fig.  
829 S6.

830

831 **Fig. S1.** PLA requires the presence of both detecting antibodies and VSV internalization.  
832 VSV mNG-P particles bearing EBOV GP were exposed to U2OS<sup>NPC1-eBFP2</sup> cells for 1 h at  
833 37°C or, to inhibit endocytosis, at 4°C. Cells were fixed, permeabilized and subjected to  
834 *in situ* PLA using GP<sub>CL</sub>-specific (MR72) or NPC1 domain C-specific (mAb-548) antibodies  
835 only, or a combination of both. The percentage of VSV<sup>+</sup>/NPC1<sup>+</sup>/PLA<sup>+</sup> compartments per  
836 cell was determined by fluorescence microscopy and presented here by individual data

837 points. Graphic bars show the average  $\pm$ SD for all data points pooled from one to two  
838 independent experiments ( $n \geq 10$ ).

839

840 **Fig. S2.** GP<sub>CL</sub>:NPC1 interface formation is required for *in situ* PLA. **(A)** VSV particles  
841 bearing EBOV GP or EBOV GP<sup>T83M/K114E/K115E</sup> were exposed to U2OS<sup>NPC1-eBFP2</sup> cells for 1 h  
842 at 37°C. After fixation, viral particles, NPC1 and GP<sub>CL</sub> were visualized by fluorescence  
843 microscopy. Representative images from two independent experiments are shown. **(B)**  
844 Virions bearing EBOV GP or EBOV GP<sup>T83M/K114E/K115E</sup> normalized for the VSV matrix protein  
845 M (data not shown) were used to infect U2OS<sup>NPC1-eBFP2</sup> cells. Infection was measured by  
846 manual counting of mNG<sup>+</sup> cells and normalized to infection with VSV mNG-P decorated  
847 with wild-type GP. Averages  $\pm$  SD for four technical replicates pooled from two  
848 independent experiments are presented. **(C)** After incubation of U2OS<sup>NPC1-eBFP2</sup> cells with  
849 3.47 (1  $\mu$ M, 1 h at 37°C), cells were either directly fixed or exposed to VSV mNG-P EBOV  
850 GP for 1 h at 37°C prior to fixation. NPC1 was detected by mAb-548 (upper panel) and  
851 GP<sub>CL</sub> was detected by MR72 (lower panel). Representative images of fluorescence  
852 microscopy from two independent experiments are shown.

853

854 **Fig. S3.** Endosomal protease activity is essential for EBOV GP-mediated particle  
855 infectivity. **(A)** U2OS<sup>NPC1-eBFP2</sup> cells were treated with E-64d (100  $\mu$ M, 6 h at 37°C) followed  
856 by infection with VSV bearing EBOV GP. Number of infected cells was determined by  
857 manual counting of mNG<sup>+</sup> cells and normalized to infection obtained in the presence of  
858 vehicle only. Averages  $\pm$  SD for four technical replicates pooled from two independent

859 experiments are presented. **(B)** After *in vitro* treatment of VSV mNG-P EBOV GP particles  
860 with thermolysin (THL) or cathepsin L (CatL), virions were normalized by a quantitative  
861 Western Blot assay detecting VSV M and exposed to U2OS<sup>NPC1-eBFP2</sup> cells. Number of  
862 infected cells was determined by manual counting of mNG<sup>+</sup> cells and normalized to  
863 infection obtained with untreated VSV mNG-P EBOV GP. Averages  $\pm$  SD for four  
864 technical replicates pooled from two independent experiments are presented.

865

866 **Fig. S4.** Characterization of CRISPR/Cas9-generated U2OS *CatB/L*-KO cells. **(A)**  
867 Alignment of the wild-type *Cat L* and *B* gene sequences with alleles in the *CatB/L*-KO  
868 cell clone. The gRNA target sequence is depicted in red, the PAM sequence is depicted  
869 in blue. **(B)** *CatB* and *CatL* activities in U2OS cell extracts were measured by fluorogenic  
870 peptide turnover. As a control, the proteolytic activity in U2OS *CatL*- or *CatB*-KO cells  
871 and U2OS cells which were pretreated for 20min with 20  $\mu$ M E-64d was also determined.  
872 Averages  $\pm$  SD for six technical replicates pooled from two independent experiments are  
873 presented. **(C)** Susceptibility of U2OS *CatB/L*-KO cells and U2OS *CatB/L*-KO cells  
874 ectopically overexpressing flag-tagged NPC1 to EBOV GP and VSV G-mediated VSV  
875 infection. Number of infected cells was determined by manual counting of eGFP<sup>+</sup> or  
876 mNG<sup>+</sup> cells and normalized to infection obtained with wild-type U2OS cells.

877

878 **Fig. S5.** *In situ* PLA allows decoupling of GP: NPC1 binding from post-NPC1 binding  
879 steps. **(A)** VSV mNG-P particles studded with EBOV GP or EBOV GP<sup>L529A/I544A</sup> were  
880 internalized into U2OS<sup>NPC1-eBFP2</sup> cells for 1 h. Following fixation, viral particles, NPC1 and

881 GP<sub>CL</sub> were visualized by fluorescence microscopy. Representative images from two  
882 independent experiments are shown. **(B)** Virions bearing EBOV GP were first complexed  
883 with KZ52, mAb100 or ADI-16061 antibodies (50µg/ml) for 1 h at room temperature, and  
884 then virus-antibody complexes were internalized into U2OS<sup>NPC1-eBFP2</sup> cells. By  
885 fluorescence microscopy, viral particles, NPC1 and bound antibodies were visualized.  
886 **(C)** Samples were generated as described in (B) and viral particles, NPC1 and GP<sub>CL</sub> (via  
887 MR72) were visualized by fluorescence microscopy.

888

889 **Fig. S6.** Small molecule inhibitors interfere with cell susceptibility to infection, virus  
890 trafficking as well as NPC1 distribution and function. **(A)** Wild-type U2OS or U2OS<sup>NPC1-</sup>  
891 <sup>eBFP2</sup> cells were preincubated with increasing amounts of indicated inhibitors and then  
892 exposed to VSV decorated with EBOV GP for 16 h at 37°C in presence of the inhibitors.  
893 Number of infected cells was determined by automated counting of eGFP<sup>+</sup> cells and  
894 normalized to infection obtained in the absence of inhibitors. Averages for six technical  
895 replicates pooled from two independent experiments are shown. **(B)** As outlined in Fig.  
896 5B, U2OS<sup>NPC1-eBFP2</sup> cells were incubated with amiodarone, bepridil, clomifene, toremifene,  
897 sertraline, and U18666A respectively, followed by VSV mNG-P EBOV GP uptake for 1 h.  
898 Cells were subjected to *in situ* PLA and analyzed by fluorescence microscopy. The  
899 percentage of double positive VSV<sup>+</sup>/NPC1<sup>+</sup> compartments per individual cell is  
900 represented by data points; bars show the average ±SD for all data points pooled from  
901 two independent experiments (n ≥ 20). VSV<sup>+</sup>/NPC1<sup>+</sup> vesicles were analyzed by unpaired  
902 two-tailed *t*-test (ns,  $P > 0.05$ ; \*,  $P < 0.05$ ; \*\*\*,  $P < 0.001$ ; \*\*\*\*,  $P < 0.0001$ ) comparing



903 inhibitor-exposed to vehicle treated cells. **(C)** U2OS<sup>NPC1-eBFP2</sup> cells were incubated with  
904 U18666A (10 $\mu$ M), amiodarone (5 $\mu$ M), clomifene (5 $\mu$ M) or DMSO carrier for 16 h at 37°C,  
905 followed by detection of NPC1 by mAb-548 (bottom panels) or NPC1 detection followed  
906 by filipin staining highlighting cholesterol accumulations (top panels) and analyzed by  
907 fluorescence microscopy.

Fig. 1

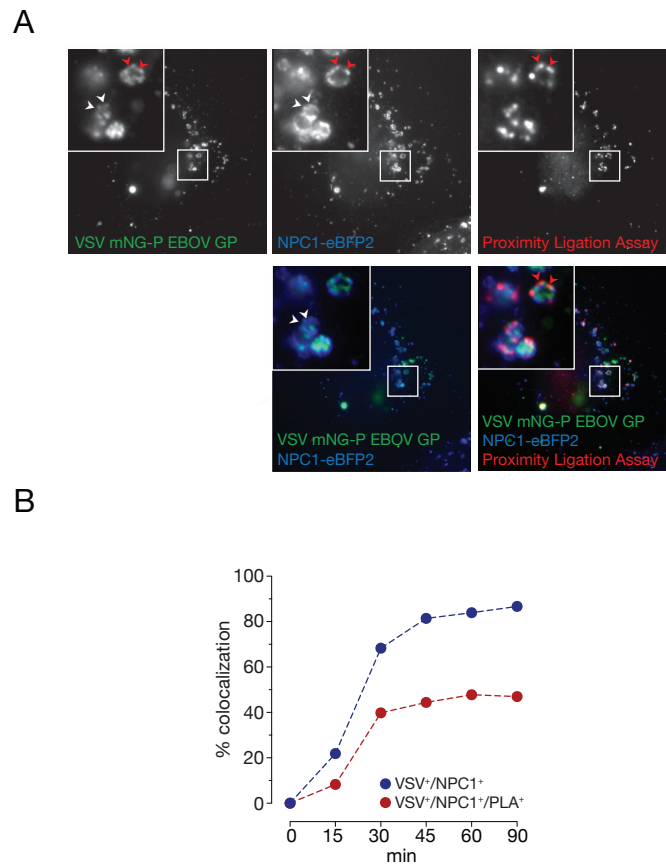

**Fig. 1.** Development of an EBOV GP: NPC1 binding assay in intact cells by *in situ* proximity ligation. **(A)** VSV mNG-P particles bearing EBOV GP were internalized into U2OS cells ectopically expressing NPC1-eBFP2 for 60 min. Cells were fixed, permeabilized and subjected to proximity ligation assay (PLA) using GP<sub>CL</sub>- and NPC1-specific antibodies (MR72/mAb-548). During amplification, resulting PLA products were labeled with a detector oligonucleotide conjugated with a red fluorophore. White arrowheads, VSV/NPC1 colocalization; red arrowheads, VSV/NPC1/PLA colocalization. **(B)** VSVs bearing EBOV GP were endocytosed into U2OS cells as described in (A), fixed at the indicated time points and subjected to PLA. VSV positive compartments (VSV<sup>+</sup>) were enumerated; the percentage of compartments also positive for NPC1 (VSV<sup>+</sup>/NPC1<sup>+</sup>) or NPC1 plus PLA (VSV<sup>+</sup>/NPC1<sup>+</sup>/PLA<sup>+</sup>) were determined. Representative curves out of two independent experiments are shown; averages of pooled cells are displayed ( $n \geq 20$  per time point).

Fig. 2

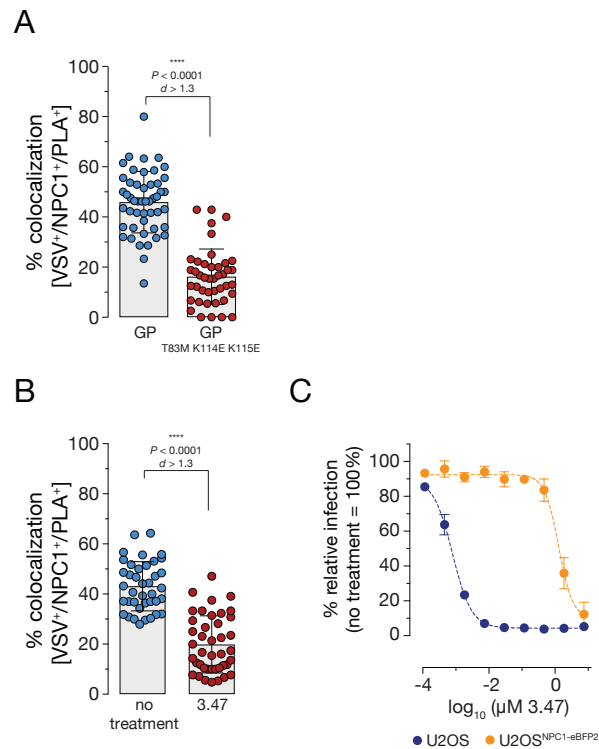

**Fig. 2.** Proximity ligation is sensitive to perturbations in the GP<sub>CL</sub>:NPC1 domain C interface. **(A)** VSV mNG-P particles bearing EBOV GP or EBOV GP<sup>T83M/K114E/K115E</sup> were internalized into U2OS<sup>NPC1-eBFP2</sup> cells for 60 min followed by cell fixation, permeabilization and PLA. Cells were analyzed by fluorescence microscopy; data points represent the percentage of VSV<sup>+</sup>/NPC1<sup>+</sup>/PLA<sup>+</sup> compartments per individual cell; bars depict the pooled averages and standard deviations ( $\pm$  SD) for all cells from two independent experiments ( $n \geq 40$ ). An unpaired two-tailed *t*-test was used to compare VSV<sup>+</sup>/NPC1<sup>+</sup>/PLA<sup>+</sup> compartments of cells infected by VSV bearing either EBOV GP or EBOV GP<sup>T83M/K114E/K115E</sup> (\*\*\*\*,  $P < 0.0001$ ). Group means calculated from the percentage of VSV<sup>+</sup>/NPC1<sup>+</sup>/PLA<sup>+</sup> vesicles were compared by Cohen's *d* effect size ( $d > 1.3$ ). **(B)** U2OS<sup>NPC1-eBFP2</sup> cells were pre-incubated with the inhibitor 3.47 (1  $\mu\text{M}$ ) for 60 min at 37°C, followed by VSV mNG-P EBOV GP uptake for 60 min and PLA. Data points were acquired and analyzed as described in (A). **(C)** After pre-incubation of U2OS<sup>NPC1-eBFP2</sup> and wild-type U2OS cells with increasing 3.47 concentrations, cells were infected with VSV mNG-P EBOV GP for 16 h. Infection was measured by automated counting of mNG<sup>+</sup> cells and normalized to infection obtained in the absence of 3.47. Averages  $\pm$  SD for six technical replicates pooled from two independent experiments are displayed. Data was subjected to nonlinear regression analysis to derive 3.47 concentration at half-maximal inhibition of infection ( $\text{IC}_{50} \pm 95\%$  confidence intervals for nonlinear curve fit).

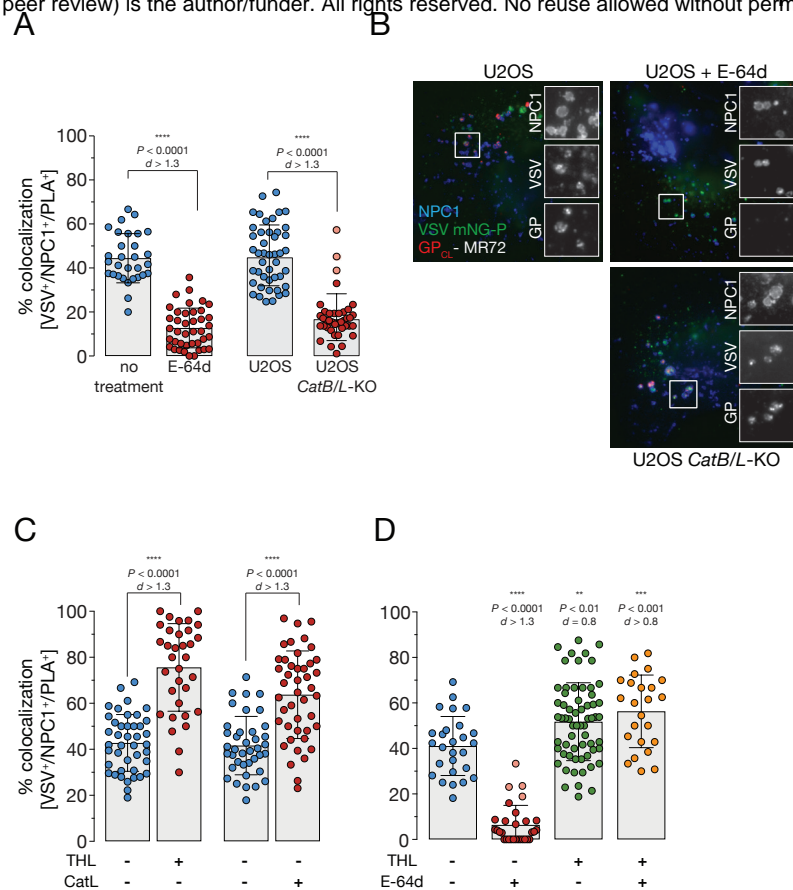

**Fig. 3.** Detection of GP<sub>CL</sub>:NPC1 binding by PLA requires endosomal cleavage of GP. **(A)** VSV mNG-P particles bearing EBOV GP were incubated with either U2OS<sup>NPC1-eBFP2</sup> cells pre-treated with E-64d (100mM, 6h at 37°C) (left panel), or U2OS *CatB/L*-KO cells ectopically expressing flag-tagged NPC1 (right panel). Cells were fixed following virus incubation (1h at 37°C), permeabilized and subjected to PLA. Data points represent the percentage of VSV<sup>+</sup>/NPC1<sup>+</sup>/PLA<sup>+</sup> compartments per individual cell; bars depict the average ±SD for all data points pooled from two independent experiments ( $n \geq 30$ ). Points with reduced transparency represent values outside of the 10th-90th percentile. An unpaired two-tailed  $t$ -test was used to compare VSV<sup>+</sup>/NPC1<sup>+</sup>/PLA<sup>+</sup> compartments of wild-type cells with either inhibitor-treated (left) or KO (right) cells infected by EBOV GP-decorated VSV (\*\*\*\*,  $P < 0.0001$ ). Group means calculated from the percentage of VSV<sup>+</sup>/NPC1<sup>+</sup>/PLA<sup>+</sup> vesicles were compared by Cohen's  $d$  effect size. **(B)** Cells described in (A) were exposed to VSV mNG-P EBOV GP uptake for 1h at 37°C. After fixation, viral particles, NPC1 and GP<sub>CL</sub> were visualized by fluorescence microscopy. Representative images from two independent experiments are shown. **(C)** VSV mNG-P particles bearing EBOV GP were treated *in vitro* with thermolysin (THL) or cathepsin L (CatL), respectively. Viral particles were taken up into U2OS<sup>NPC1-eBFP2</sup> cells, followed by fixing of the cells and subjecting them to PLA. Data points represent the percentage of VSV<sup>+</sup>/NPC1<sup>+</sup>/PLA<sup>+</sup> compartments per individual cell; bars depict the average ±SD for all data points pooled from two independent experiments ( $n \geq 25$ ). To compare VSV<sup>+</sup>/NPC1<sup>+</sup>/PLA<sup>+</sup> compartments of cells which endocytosed VSV studded with either uncleaved or THL/CatL- cleaved GP, an unpaired two-tailed  $t$ -test was used (\*\*\*\*,  $P < 0.0001$ ). Cohen's  $d$  effect size was used to compare the group means calculated from the percentages of VSV<sup>+</sup>/NPC1<sup>+</sup>/PLA<sup>+</sup> vesicles ( $d > 1.3$ ). **(D)** U2OS<sup>NPC1-eBFP2</sup> cells were (not) pre-incubated with E-64d (as described in [A]) and VSV mNG-P particles bearing EBOV GP were treated *in vitro* with THL. Following virus internalization into U2OS<sup>NPC1-eBFP2</sup> cells, cells were fixed and subjected to PLA. Data points represent the percentage of VSV<sup>+</sup>/NPC1<sup>+</sup>/PLA<sup>+</sup> compartments per individual cell; bars depict the average ±SD for all data points pooled from two independent experiments ( $n \geq 25$ ). Points with reduced transparency represent values outside of the 10th-90th percentile. To compare VSV<sup>+</sup>/NPC1<sup>+</sup>/PLA<sup>+</sup> compartments of E-64d-treated cells with those of untreated cells which endocytosed VSV studded with either uncleaved or THL-cleaved GP, an unpaired two-tailed  $t$ -test was used (\*\*,  $P < 0.01$ ; \*\*\*,  $P < 0.001$ ; \*\*\*\*,  $P < 0.0001$ ). Cohen's  $d$  effect size was used to compare the group means calculated from the percentages of VSV<sup>+</sup>/NPC1<sup>+</sup>/PLA<sup>+</sup> vesicles.

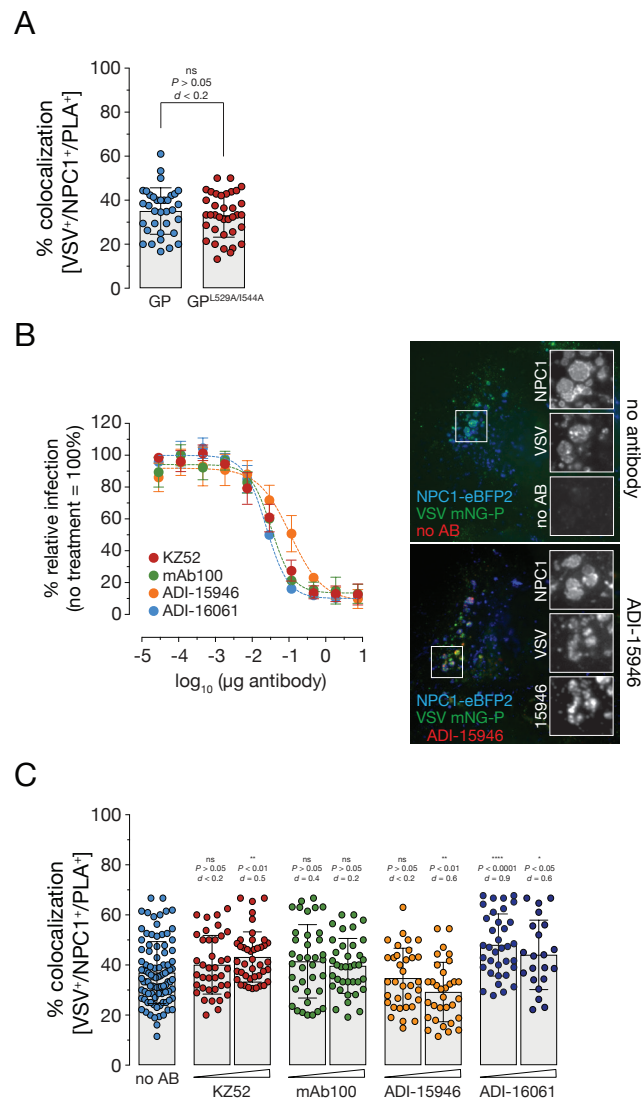

**Fig. 4.** *In situ* proximity ligation decouples GP<sub>CL</sub>:NPC1 interaction from post-binding entry steps. **(A)** VSV mNG-P particles bearing EBOV GP or EBOV GP<sup>L529A/1544A</sup> were internalized into U2OS<sup>NPC1-eBFP2</sup> cells for 60 min followed by PLA. Data points represent the percentage of triple positive compartments per individual cell; bars depict the average  $\pm$ SD for all data points pooled from two independent experiments ( $n \geq 37$ ). Data analyses included an unpaired two-tailed *t*-test to compare VSV<sup>+</sup>/NPC1<sup>+</sup>/PLA<sup>+</sup> vesicles of cells which internalized VSV decorated with wild-type or mutant GP (ns,  $P > 0.05$ ). Cohen's *d* effect size was used to compare the group means calculated from the percentages of VSV<sup>+</sup>/NPC1<sup>+</sup>/PLA<sup>+</sup> compartments. **(B)** ADI-15946 was incubated with VSV EBOV GP particles and exposed to U2OS<sup>NPC1-eBFP2</sup> (right panel). After virus uptake for 1h at 37°C, cells were fixed and viral particles, NPC1 and bound antibodies were visualized by fluorescence microscopy. Representative images from two independent experiments are shown. Virions were preincubated with increasing amounts of KZ52, mAb100, ADI-15946 or ADI-16061 and then exposed to U2OS<sup>NPC1-eBFP2</sup> cells for 16 h at 37°C (left panel). Number of infected cells was determined by automated counting of mNG<sup>+</sup> cells and normalized to infection obtained in the absence of antibodies. Averages  $\pm$  SD for six technical replicates pooled from two independent experiments are shown. **(C)** VSV mNG-P EBOV GP virions were complexed with KZ52, mAb100, ADI-15946 or ADI-16061 (50  $\mu$ g/ml and 100  $\mu$ g/ml) for 1 h at room temperature. Following internalization into U2OS<sup>NPC1-eBFP2</sup> cells were fixed, and subjected to *in situ* PLA. Data points represent the percentage of VSV<sup>+</sup>/NPC1<sup>+</sup>/PLA<sup>+</sup> compartments per individual cell; bars show the average  $\pm$ SD for all data points pooled from two independent experiments ( $n \geq 22$ ). VSV<sup>+</sup>/NPC1<sup>+</sup>/PLA<sup>+</sup> vesicles were analyzed by unpaired two-tailed *t*-test (ns,  $P > 0.05$ ; \*,  $P < 0.05$ ; \*\*,  $P < 0.01$ ; \*\*\*\*,  $P < 0.0001$ ) comparing cells which were exposed to virion-antibody complexes to cells exposed to untreated virus. Group means calculated from the percentage of VSV<sup>+</sup>/NPC1<sup>+</sup>/PLA<sup>+</sup> vesicles were also compared by Cohen's *d* effect size.

Fig. 5

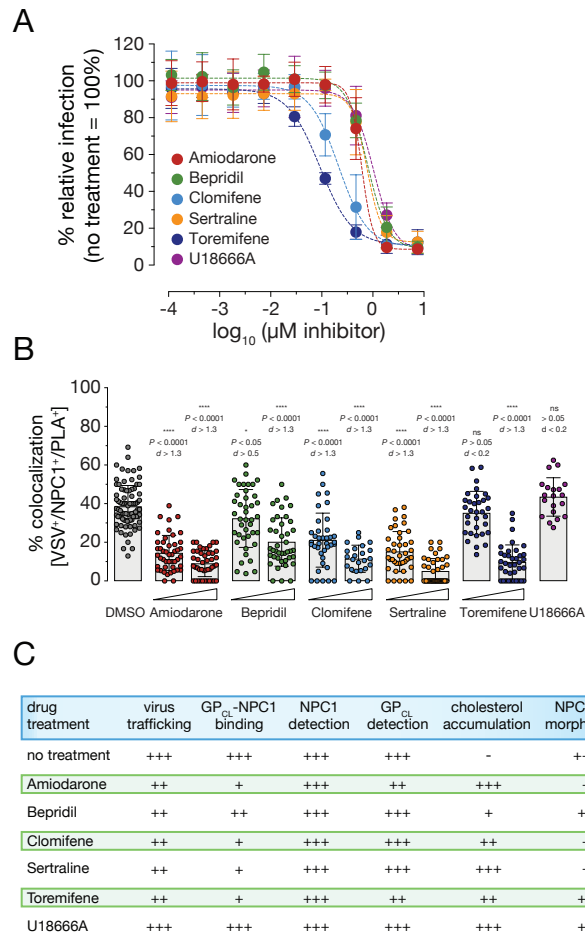

**Fig. 5.** Small molecule inhibitor-mediated selective interference of GP:NPC1 binding delineated by *in situ* PLA. **(A)** U2OS<sup>NPC1-eBFP2</sup> cells were preincubated with increasing concentrations of amiodarone, bepridil, clomifene, sertraline, toremifene, and U18666A, respectively before exposed to VSV mNG-P EBOV GP for 16 h at 37°C. Infection was measured by automated counting of mNG<sup>+</sup> cells and normalized to infection obtained in the presence of vehicle only. Averages ± SD for nine to eighteen technical replicates pooled from three to six independent experiments are displayed. **(B)** U2OS<sup>NPC1-eBFP2</sup> cells were incubated with amiodarone, bepridil, clomifene, and sertraline, respectively (2 µM or 5 µM, 1 h at 37°C), or toremifene (2 µM or 10 µM, 1 h at 37°C), or U18666A (10 µM, 2 h at 37°C), followed by VSV mNG-P EBOV GP uptake for 1 h. Cells were subjected to *in situ* PLA and analyzed by fluorescence microscopy. The percentage of triple positive VSV<sup>+</sup>/NPC1<sup>+</sup>/PLA<sup>+</sup> compartments per individual cell is represented by data points; bars show the average ±SD for all data points pooled from two independent experiments ( $n \geq 20$ ). VSV<sup>+</sup>/NPC1<sup>+</sup>/PLA<sup>+</sup> vesicles were analyzed by unpaired two-tailed *t*-test (ns,  $P > 0.05$ ; \*,  $P < 0.05$ ; \*\*\*\*,  $P < 0.0001$ ) comparing inhibitor-exposed to untreated cells. Group means calculated from the percentage of VSV<sup>+</sup>/NPC1<sup>+</sup>/PLA<sup>+</sup> compartments were also compared by Cohen's *d* effect size. **(C)** Table summarizing results from Fig. 5B and Fig. S6.
